# Supplementary material for: Increased Cell-Free DNA Plasma Concentration Following Liver Transplantation Is Linked to Portal Hepatitis and Inferior Survival
Source: PubMed Central journal article supplement (PMC7291032; doi:10.3390/jcm9051543), 2020-05-20
Supplement: jcm-09-01543-s001.pdf [file jcm-09-01543-s001.pdf]

**Suppl. Table 1. Baseline characteristics of organ donors**

| <b>Clinical parameters</b>         | <b>cfDNA low (90 bp)</b><br><i>n</i> = 41 | <b>cfDNA high (90 bp)</b><br><i>n</i> = 9 | <b>*<i>p</i>-value</b> |
|------------------------------------|-------------------------------------------|-------------------------------------------|------------------------|
| Age (years)                        | 56 (19–86)                                | 50 (39–66)                                | 0.181                  |
| Sex                                |                                           |                                           | 0.722                  |
| <i>Female</i>                      | 17                                        | 3                                         |                        |
| <i>Male</i>                        | 24                                        | 6                                         |                        |
| BMI (kg/m <sup>2</sup> )           | 26.1 (19.5–34.9)                          | 27.7 (20.6–34.2)                          | 0.451                  |
| <b>Reanimation (yes/no)</b>        | <b>11/30</b>                              | <b>7/2</b>                                | <b>&lt;0.001</b>       |
| ROSC ( <i>min</i> )                | 0 (0–125)                                 | 7 (0–45)                                  | 0.107                  |
| Brain death due to                 |                                           |                                           |                        |
| <i>Intracranial bleeding</i>       | 18                                        | 5                                         | 0.525                  |
| <i>Traumatic brain injury</i>      | 8                                         | 1                                         | 0.658                  |
| <i>Thrombembolic event</i>         | 8                                         | 0                                         | 0.178                  |
| <i>Hypoxia</i>                     | 7                                         | 3                                         | 0.177                  |
| Microscopic liver fat (%)          | 5 (0–90)                                  | 0 (0–60)                                  | 0.427                  |
| Stay at ICU (days before donation) | 3.5 (0–16)                                | 1.5 (0–11)                                | 0.095                  |
| Diuresis during last 24 h (ml)     | 3600 (1131–9800)                          | 4939 (1860–6400)                          | 0.420                  |
| Bilirubin total, mg/dl             | 0.57 (0.17–4.1)                           | 0.64 (0.3–2.8)                            | 0.924                  |
| Creatinine, mg/dl                  | 1.0 (0.20–2.25)                           | 0.86 (0.44–2.11)                          | 0.705                  |
| Aspartate transaminase, U/l        | 90 (16–684)                               | 145 (12–436)                              | 0.643                  |
| Alanine transaminase, U/l          | 52 (4–484)                                | 80 (20–828)                               | 0.571                  |

*Continuous values are presented as median values and categorical values as numbers. Continuous variables were assumed to be non-normally distributed, and were tested using the Kruskal-Wallis test or the Mann-Whitney U test for pairwise analyses. The  $\chi^2$  test or Fisher's exact test were used to test univariate differences between categorical variables.*

**Suppl. Table 2. Surgical and clinical parameters of the study cohort.**

| <b>Clinical parameters</b>            | <b>cfDNA low (90 bp)</b><br><i>n</i> = 41 | <b>cfDNA high (90 bp)</b><br><i>n</i> = 9 | <b>*<i>p</i>-value</b> |
|---------------------------------------|-------------------------------------------|-------------------------------------------|------------------------|
| Surgical time, min                    | 344 (235–557)                             | 320 (266–424)                             | 0.414                  |
| Cold ischemia time, min               | 526 (280–850)                             | 592 (360–770)                             | 0.264                  |
| Warm ischemia time, min               | 40 (25–58)                                | 40 (21–60)                                | 0.829                  |
| Red blood cell transfusion (intraop.) | 6 (0–20)                                  | 4 (0–27)                                  | 0.837                  |
| Fresh frozen plasma (intraop.)        | 17 (0–57)                                 | 18 (13–59)                                | 0.257                  |
| International normalized ratio        | 1.52 (1.17–2.93)                          | 1.79 (1.33–2.27)                          | 0.124                  |
| Bilirubin, mg/dl                      | 3.7 (1.1–17.0)                            | 4.23 (0.73–11.8)                          | 0.905                  |
| Creatinine, mg/dl                     | 0.95 (0.57–4.49)                          | 1.19 (0.58–1.8)                           | 0.780                  |
| <b>Aspartate transaminase, U/L</b>    | <b>710 (182–7000)</b>                     | <b>2013 (1075–7000)</b>                   | <b>&lt;0.001</b>       |
| <b>Alanine transaminase, U/L</b>      | <b>376 (48–3301)</b>                      | <b>1391 (706–2576)</b>                    | <b>0.001</b>           |
| Acute rejection 1 year (yes/no)       | 20/21                                     | 7/2                                       | 0.114                  |
| BANF > 1                              | 12                                        | 2                                         | 0.669                  |
| Length of stay (days)                 | 28 (13–122)                               | 29 (17–158)                               | 0.436                  |
| <b>ICU stay (days)</b>                | <b>8 (3–87)</b>                           | <b>11 (5–98)</b>                          | <b>0.027</b>           |
| EROD (yes/no)                         | 11/30                                     | 4/5                                       | 0.296                  |
| Death due to                          |                                           |                                           |                        |
| Vascular complication                 | 0                                         | 0                                         |                        |
| <b>Liver abscess/sepsis (yes/no)</b>  | <b>2/37</b>                               | <b>3/6</b>                                | <b>0.004</b>           |
| Bile leakage (yes/no)                 | 2/39                                      | 0/9                                       | 1.000                  |

Listed laboratory results were determined simultaneously alongside cfDNA when patients arrived at the ICU after transplantation. Continuous values are presented as median values and categorical values as numbers. Continuous variables were assumed to be non-normally distributed, and were tested using the Kruskal-Wallis test or the Mann-Whitney U test for pairwise analyses. The  $\chi^2$  test or Fisher's exact test were used to test univariate differences between categorical variables.

**Suppl. Table 3: Preoperative renal replacement therapy**

|                   | <b>Preoperative RRT</b><br>n = 4 | <b>No RRT</b><br>n = 46 | <b>*p-value</b> |
|-------------------|----------------------------------|-------------------------|-----------------|
| cfDNA 90bp, ng/ml | 20.62 (5.77–79.73)               | 30.2 (0.47–143.6)       | 0.769           |

*cfDNA was determined when patients arrived at the ICU after transplantation. Continuous values are presented as median values and were assumed to be non-normally distributed, and were tested using the Kruskal-Wallis test or the Mann-Whitney U test for pairwise analyses. Renal replacement therapy (RRT)*

A

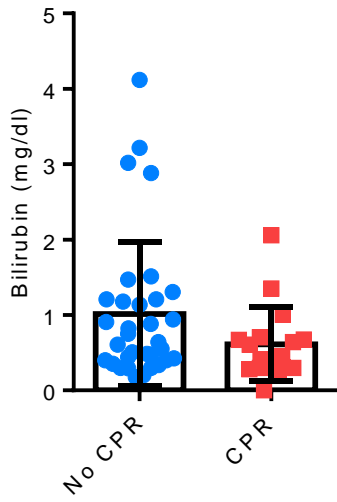

B

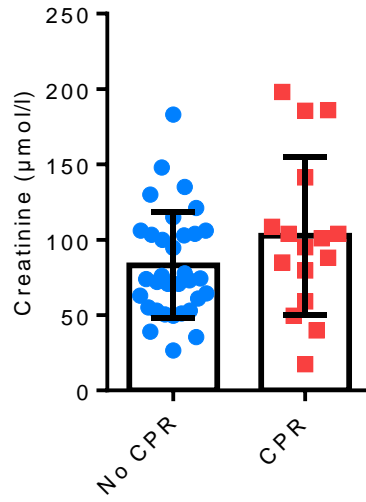

**Suppl. Figure 1:** The patients were grouped in cardiopulmonary resuscitation. Statistics: Mann-Whitney U-Test; Log-rank test (for survival); \* P < 0.05; \*\* P < 0.01; \*\*\* P < 0.001.

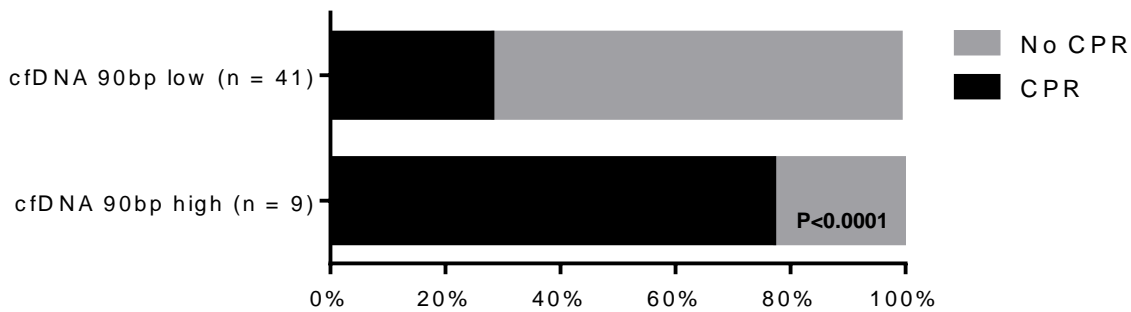

**Suppl. Figure 2:** Cell-free DNA (cfDNA) was determined in plasma from the liver transplanted patients (n = 50) and analyzed according to cardiopulmonary resuscitation (CPR). Samples were taken, when patients were admitted postoperatively to the intensive care unit. L1PA2 element non-coding sequence 90bp was determined by qPCR (L1PA2 element, 90bp, LINE sequence, non-coding). Statistics: Mann-Whitney U-Test; \* P < 0.05; \*\* P < 0.01; \*\*\* P < 0.001.

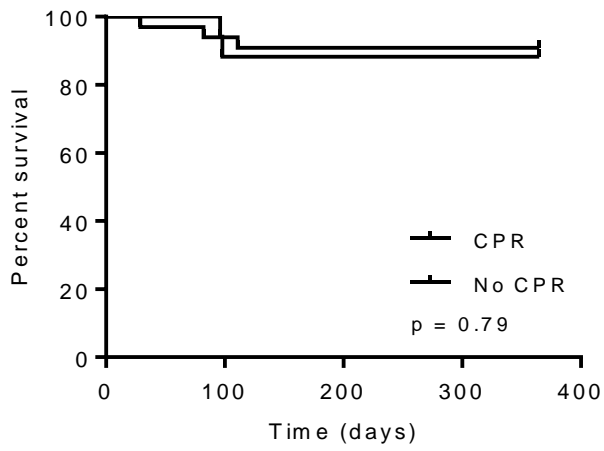

**Suppl. Figure 3:** Patients were analyzed according 1-year survival grouped in CPR and no CPR of the donor. Statistics: Mann-Whitney U-Test; Log-rank test (for survival); \*  $P < 0.05$ ; \*\*  $P < 0.01$ ; \*\*\*  $P < 0.001$ .

A

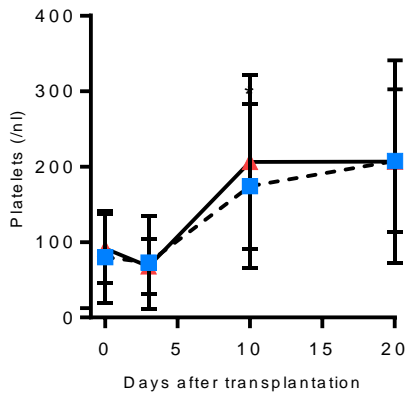

B

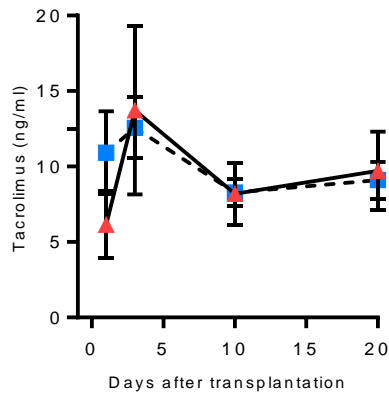

■ cfDNA 90bp low  
▲ cfDNA 90bp high

**Suppl. Figure 4:** Presentation of the course of monocytes, platelets after liver transplantation (n = 50). Patients were classified according to cfDNA concentration (L1PA2 element, 90bp, LINE sequence, non-coding). Statistics: Mann-Whitney U-Test; \* P < 0.05; \*\* P < 0.01; \*\*\* P < 0.001

A

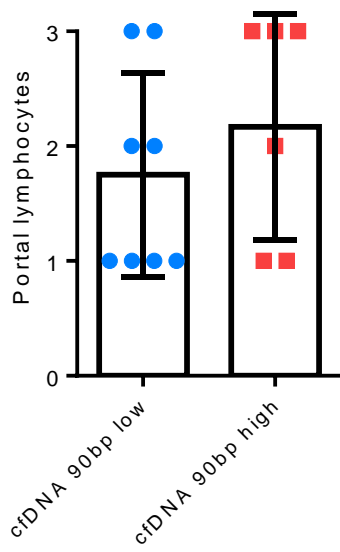

B

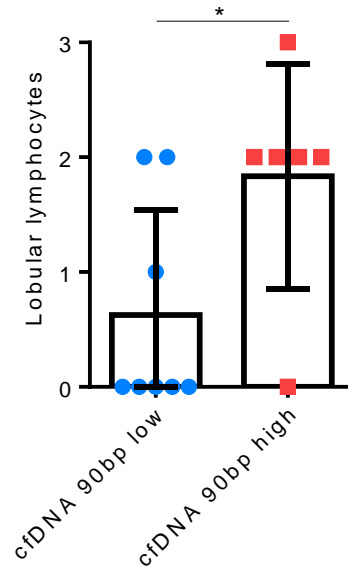

**Suppl. Figure 5:** Liver biopsies as part of clinical diagnostics were evaluated based on hematoxylin-eosin stained-tissue sections. The presence and quantity of lymphocytes was determined and patients were grouped in high and low cfDNA levels (L1PA2 element, 90bp, LINE sequence, non-coding). Note, rejection > BANFF 1 were excluded. Statistics: Mann-Whitney U-Test; \* P < 0.05; \*\* P < 0.01; \*\*\* P < 0.001
